# Supplementary material
Source: MDPI journal article supplement (https://www.mdpi.com/2071-1050/7/12/15794)
Supplement: s1 [file s1]

# Supplementary Material: A Handshake between Markets and Hierarchies: Geese as an Example of Successful Collaborative Management of Ecosystem Services

Magnus Tuvendal and Johan Elmberg

**Table S1.** Ten goose taxa occur regularly in Southern Sweden, but they differ in status and management needs. Trends refer to the last 20 years. National breeding estimates are from Ottosson *et al.*, (2012). "Overgrazing" refers to natural vegetation, as opposed to "crop damage". "Annual cull" refers to Sweden only and the period after 2005, and does not differentiate between the two races of Bean Goose. "NS" = No open hunting season in Sweden (in Barnacle Goose there is culling by permit).

| Taxon                                                    | National Trend (Breeding)         | National Trend (Staging/Winter)     | Management Challenge                                                                                     | Annual Cull |
|----------------------------------------------------------|-----------------------------------|-------------------------------------|----------------------------------------------------------------------------------------------------------|-------------|
| Barnacle goose<br><i>Branta leucopsis</i>                | Strong increase<br>(4900 pairs)   | Strong increase                     | Eutrophication<br>Overgrazing?                                                                           | NS, <500?   |
| Brent goose<br><i>Branta bernicla</i>                    | Does not breed                    | Stable                              | Conservation of shallow coastal wetlands                                                                 | NS          |
| Red-breasted goose<br><i>Branta ruficollis</i>           | Does not breed                    | Extremely rare vagrant              | Globally endangered                                                                                      | NS          |
| Canada goose<br><i>Branta canadensis</i>                 | Strong increase<br>(17,000 pairs) | Has increased strongly              | Eutrophication<br>Crop damage<br>Overgrazing & littering<br>Aggressive behaviour<br>Disease propagation? | 30,000      |
| Lesser white-fronted goose<br><i>Anser erythropus</i>    | Severe decline<br>(20 pairs)      | Declining, extremely rare           | Almost extinct in the Nordic countries                                                                   | NS          |
| White-fronted goose<br><i>Anser albifrons</i>            | Does not breed                    | Fairly stable                       | Crop damage (local)                                                                                      | <200        |
| Greylag goose<br><i>Anser anser</i>                      | Strong increase<br>(41,000 pairs) | Strong increase                     | Eutrophication<br>Crop damage<br>Overgrazing<br>Disease propagation?                                     | 12,000      |
| Tundra Bean goose<br><i>Anser (fabalis) serrirostris</i> | Does not breed                    | Not well known, possibly increasing | Spring staging sites<br>Crop damage?                                                                     | ?           |
| Taiga Bean goose<br><i>Anser (fabalis) fabalis</i>       | Declining ?<br>(850 pairs)        | Stable after previous decrease      | Spring staging sites<br>Crop damage?                                                                     | 4000        |
| Pink-footed goose<br><i>Anser brachyrhynchos</i>         | Does not breed                    | Small numbers, stable               | Mixes with hunted species                                                                                | NS          |

Ottosson, U.; Ottvall, R.; Elmberg, J.; Green, M.; Gustafsson, R.; Haas, F.; Holmqvist, N.; Lindström, Å.; Nilsson, L.; Svensson, M.; Svensson, S.; Tjernberg, M. 2012. Fåglarna i Sverige—antal och förekomst. Sveriges Ornitologiska Förening. ISBN 978-91-88124-00-5. Survey questions posed to the present members of the goose management group of north-eastern Scania (GMG).

## Supplementary Material Text file S2

Success and abilities

1. Which issue are you most proud of that the group have resolved?
2. Give an example (a challenge, problem, conflict) that you feel the group has successfully managed.
3. Considering this example—what did the group contribute with, *i.e.*, what made it possible for the group to resolve this?
4. Give a second example (a challenge, problem, conflict) that you feel the group has successfully managed.

5. Considering this second example—what did the group contribute with, *i.e.*, what made it possible for the group to resolve this?
6. Give a third example (a challenge, problem, conflict) that you feel the group has successfully managed.
7. Considering this third example—what did the group contribute with, *i.e.*, what made it possible for the group to resolve this?

#### Challenges and limitations of the group

8. Give an example of an issue or problem that has been addressed at a meeting of the group but that you feel the group has not been able to resolve.
9. In this case— why was the group not able to resolve the issue?
10. Give a second example of an issue or problem that has been addressed at a meeting of the group but that you feel the group has not been able to resolve.
11. In this second example—why was the group not able to resolve the issue?
12. Give a third example of an issue or problem that has been addressed at a meeting of the group but that you feel the group has not been able to resolve.
13. In this third example—why was the group not able to resolve the issue?

#### The group in the eyes of others

14. If you describe the group, and what works well in the group, to others (not to group members)—which abilities of the group do you then highlight?
15. Can you provide an example of something that others (not group members) misunderstand or criticise regarding the work of the group?

#### Development of the group

16. What is it that the group, most of all, should have the power to decide over that you do not have jurisdiction over today?
17. Can you provide an example of knowledge that would be valuable for the group, but is missing today?
18. Are there any issues today, or have been in the past, that are too sensitive to bring up at group meetings?
19. Is the composition of the group adequate or is a particular competence or representative lacking?
20. What is it that motivates you to be part of the group?
